# Supplementary material
Source: Elsevier journal article supplement (https://www.sciencedirect.com/science/article/pii/S2605153219301372)
Supplement: mmc1 [file S2605153219301372:mmc1.pdf]

## Rendimiento de las funciones de riesgo cardiovascular propuestas para España en la población extremeña de la cohorte HERMEX

### MATERIAL ADICIONAL

**Tabla 1 del material adicional - Resultados esperados, observados y rendimiento de las distintas funciones de riesgo en pacientes diabéticos**

|                                             | Cardiopatía isquémica    |                          | Riesgo cardiovascular global |                          |
|---------------------------------------------|--------------------------|--------------------------|------------------------------|--------------------------|
| <i>Función de riesgo</i>                    | REGICOR                  | FRESCO CI <sup>a</sup>   | SCORE (BR + OP)              | FRESCO ECV <sup>a</sup>  |
| N total (% mujeres)                         | 244 (49,2)               | 171 (50,3)               | 281 (51,6)                   | 171 (50,3)               |
| <i>Incidencia acumulada a 7 años</i>        |                          |                          |                              |                          |
| Casos (%)                                   | 14 (5,74)                | 12 (7,02)                | 14 (4,98)                    | 21 (12,3)                |
| <i>Incidencia por Kaplan-Meier a 7 años</i> |                          |                          |                              |                          |
| % (IC95%)                                   | 6,45 (3,03 – 9,87)       | 7,31 (2,93 – 11,7)       | 5,74 (2,69 – 8,79)           | 13,82 (7,65 – 19,99)     |
| <i>Riesgos estimados a 7 años</i>           |                          |                          |                              |                          |
| Media (DE)                                  | 5,58 (3,23)              | 4,87 (3,76)              | 8,40 (8,08)                  | 8,01 (5,32)              |
| <i>Calibración global</i>                   |                          |                          |                              |                          |
| Razón riesgos E/O (IC95%)                   | 0,864<br>(0,565 – 1,839) | 0,658<br>(0,411 – 1,642) | 1,464<br>(0,956 – 3,123)     | 0,583<br>(0,403 – 1,054) |
| <i>Discriminación</i>                       |                          |                          |                              |                          |
| Índice C de Harrell (IC95%)                 | 0,706<br>(0,595 – 0,817) | 0,605<br>(0,494 – 0,716) | 0,776<br>(0,649 – 0,903)     | 0,657<br>(0,557 – 0,758) |

IC95%: intervalo de confianza del 95%; FRESCO CI: función FRESCO para estimación del riesgo de cardiopatía isquémica; FRESCO ECV: función FRESCO para estimación de riesgo cardiovascular global; SCORE BR + OP: funciones SCORE para países de bajo riesgo y para personas mayores.

**Figura 1 del material adicional - Calibración mediante la prueba de bondad de ajuste de Hosmer–Lemeshow para cada función de riesgo en la población diabética**

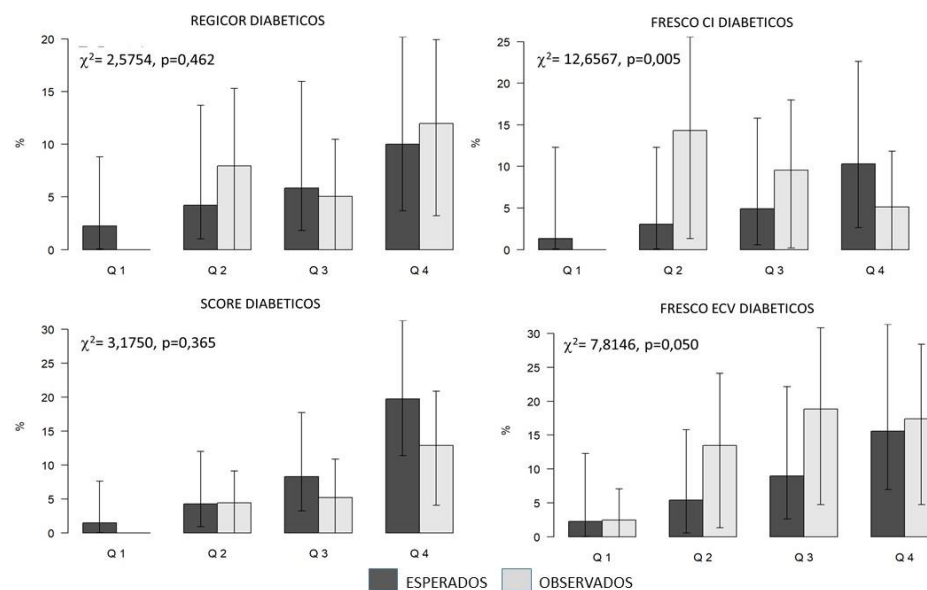

FRESCO CI: función FRESCO para estimación del riesgo de cardiopatía isquémica; FRESCO ECV: función FRESCO para estimación de riesgo cardiovascular global; SCORE BR + OP: funciones SCORE para países de bajo riesgo y para personas mayores.

**Figura 2 del material adicional - Distribución de la población diabética y proporción de casos por categorías de riesgo para cada una de las funciones según sus condiciones de uso**

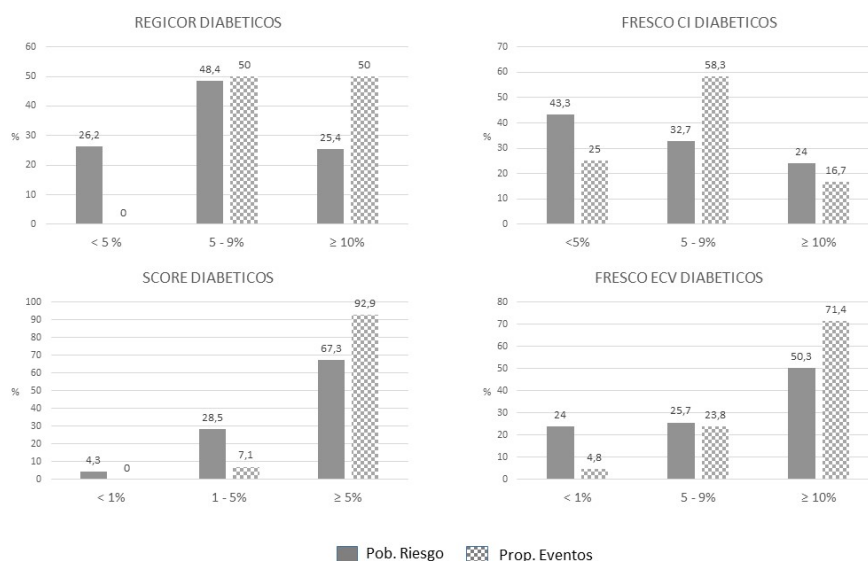

Se han fusionado las categorías de riesgo alta y muy alta y se han mantenido los puntos de corte de las categorías de riesgo a 10 años para una mejor comprensión. Los puntos de corte para los 7 años de seguimiento se encuentran en el texto.

FRESCO CI: función FRESCO para estimación del riesgo de cardiopatía isquémica; FRESCO ECV: función FRESCO para estimación de riesgo cardiovascular global; Prop. Eventos: proporción de eventos cardiovasculares sobre el total por categorías de riesgo; Pob. Riesgo: proporción de población estudiada por categorías de riesgo; SCORE BR + OP: funciones SCORE para países de bajo riesgo y para personas mayores.
